# Supplementary material for: A single-step room-temperature electrochemical synthesis of nitrogen-doped graphene nanoribbons from carbon nanotubes
Source: Royal Society of Chemistry journal article supplement (doi:10.1039/c5ta03869c), 2015-01-01
Supplement: c5ta03869c1.pdf [file c5ta03869c1.pdf]

## Supporting information

### A single-step room-temperature electrochemical synthesis of nitrogen-doped graphene nanoribbons from carbon nanotubes

M.J. Jaison,<sup>a</sup> Tharangattu N. Narayanan,<sup>b</sup> T. Prem Kumar,<sup>a</sup> and Vijaymohanan K. Pillai<sup>\*a</sup>

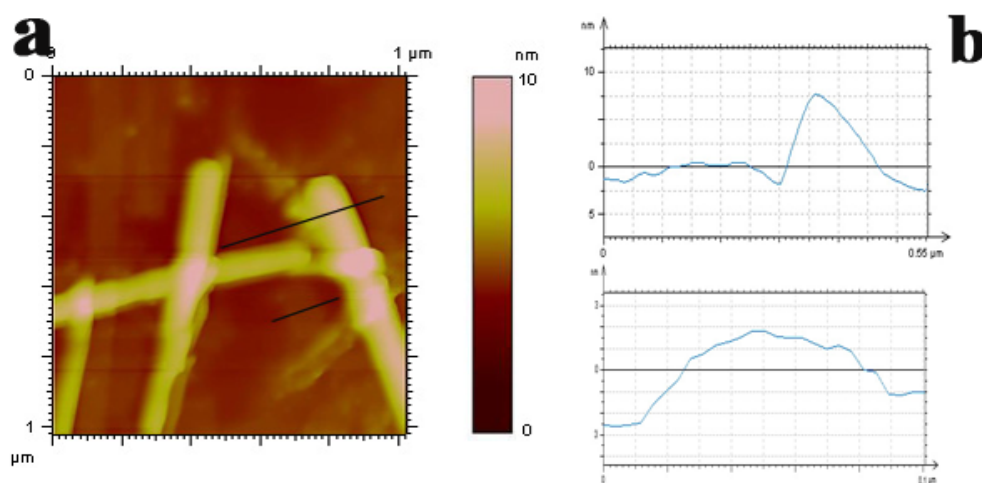

**Fig. SI 1** (a) AFM image of N-doped GNRs showing widths ranging from 80 to 150 nm; and (b) height profiles for the marked areas showing layer thickness of 2 and 8 nm.

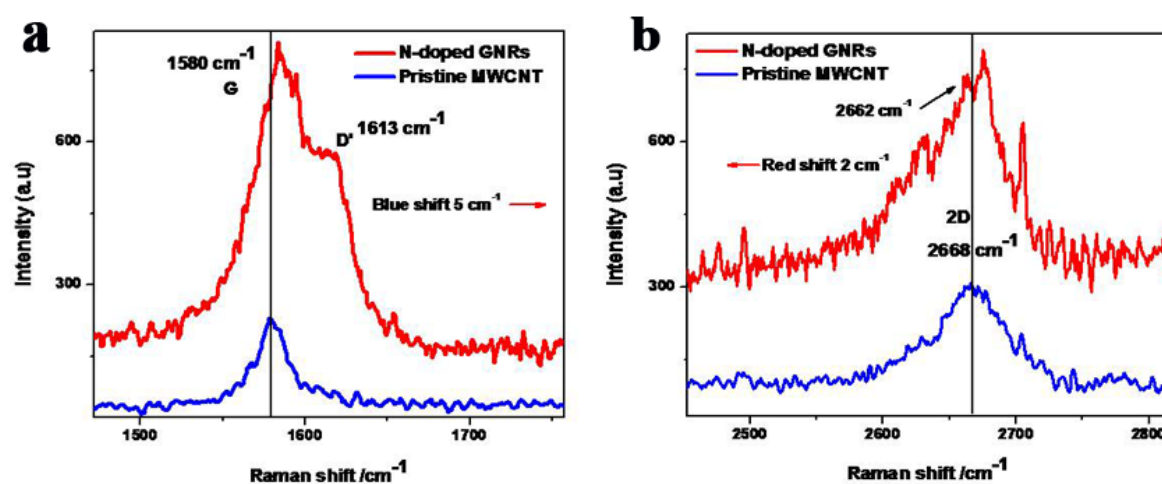

**Fig. SI 2** (a) High-resolution Raman spectra showing the G band at  $\sim 1580 \text{ cm}^{-1}$  for MWCNTs and N-doped GNRs. N-doped GNRs show a shoulder (D' band) at  $1613 \text{ cm}^{-1}$  and a relative blue shift of  $5 \text{ cm}^{-1}$  from MWCNTs. (b) High-resolution Raman spectra showing 2D band at  $2668 \text{ cm}^{-1}$  for MWCNTs and N-doped GNRs. The latter shows a red shift of  $2 \text{ cm}^{-1}$  and an extra small peak at  $2662 \text{ cm}^{-1}$ .

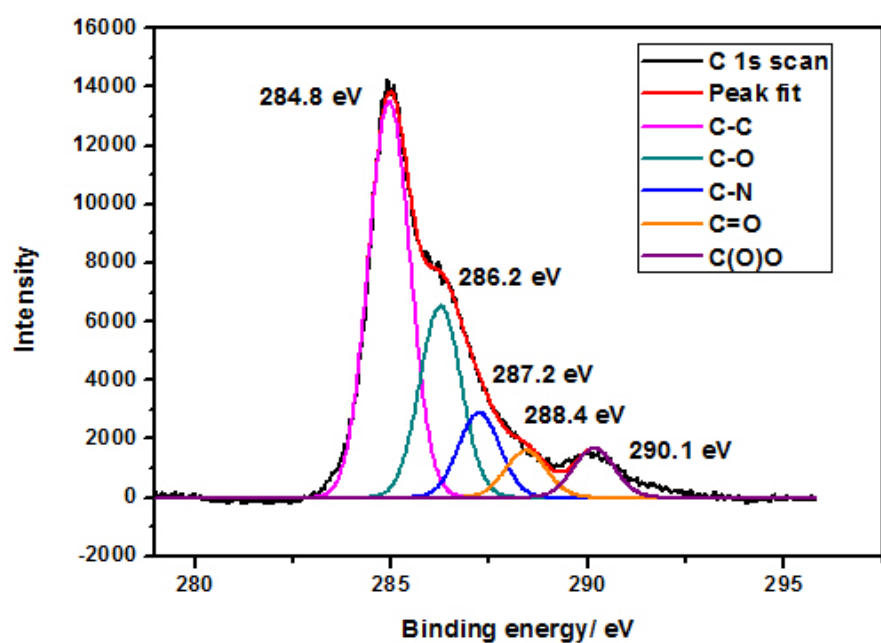

**Fig. SI 3** High-resolution C 1s XPS spectrum of N-doped GNRs showing the presence of C–C, C–O, C–N, –C=O, and C(O)O bonding features at binding energies of 284.8, 286.2, 287.2, 288.4, and 290.1 eV, respectively.

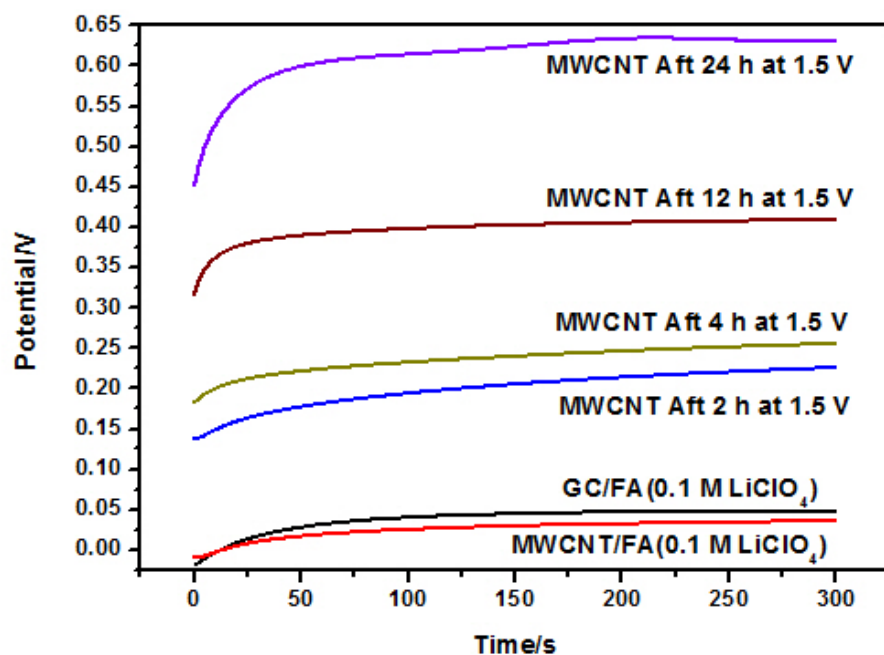

**Fig. SI 4.** Open circuit potentials of MWCNT-coated GC in formamide containing 0.1 M LiClO<sub>4</sub> against Pt wire quasi reference electrode. The OCPs for MWCNT-coated GC were 0.04, 0.20, 0.24, 0.40 and 0.62 V, respectively, for electric field exposure of 0, 2, 4, 12, and 24 h, respectively.
